# Supplementary material
Source: publisher figshare collection journal article supplement (https://sage.figshare.com/ndownloader/files/13812101)

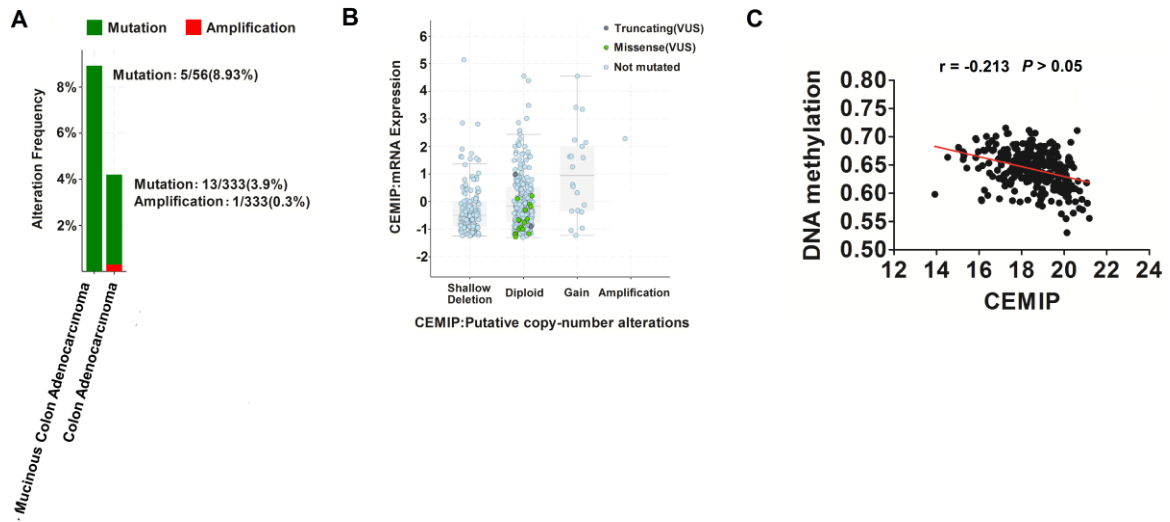

Figure S1.

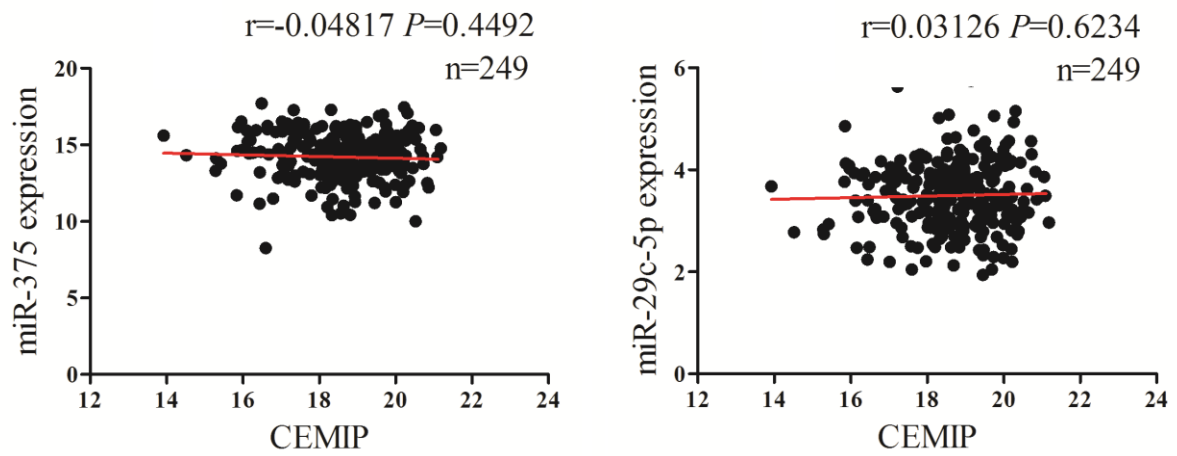

Figure S2.

Supplement: Supplementary file 1 [file 13812101]
